# Supplementary material for: Phonon bottleneck and long-lived excited states in π-conjugated pyrene hoop
Source: Royal Society of Chemistry journal article supplement (doi:10.1039/c7cp00094d), 2017-01-01
Supplement: c7cp00094d1.pdf [file c7cp00094d1.pdf]

Supplementary Information for:  
**Phonon Bottleneck and Long-Lived Excited  
States in  $\pi$ -Conjugated Pyrene Hoop**

Ricardo Franklin-Mergarejo,<sup>†</sup> Tammie Nelson,<sup>‡</sup> Sergei Tretiak,<sup>\*,‡</sup> and Sebastian  
Fernandez-Alberti<sup>\*,†</sup>

*Universidad Nacional de Quilmes/CONICET, and Los Alamos National Laboratory*

E-mail: serg@lanl.gov; sfalberti@gmail.com

---

\*To whom correspondence should be addressed

<sup>†</sup>Universidad Nacional de Quilmes/CONICET, Roque Saenz Peña 352, B1876BXD Bernal, Argentina

<sup>‡</sup>Theoretical Division, Los Alamos National Laboratory, Los Alamos, New Mexico 87545, USA

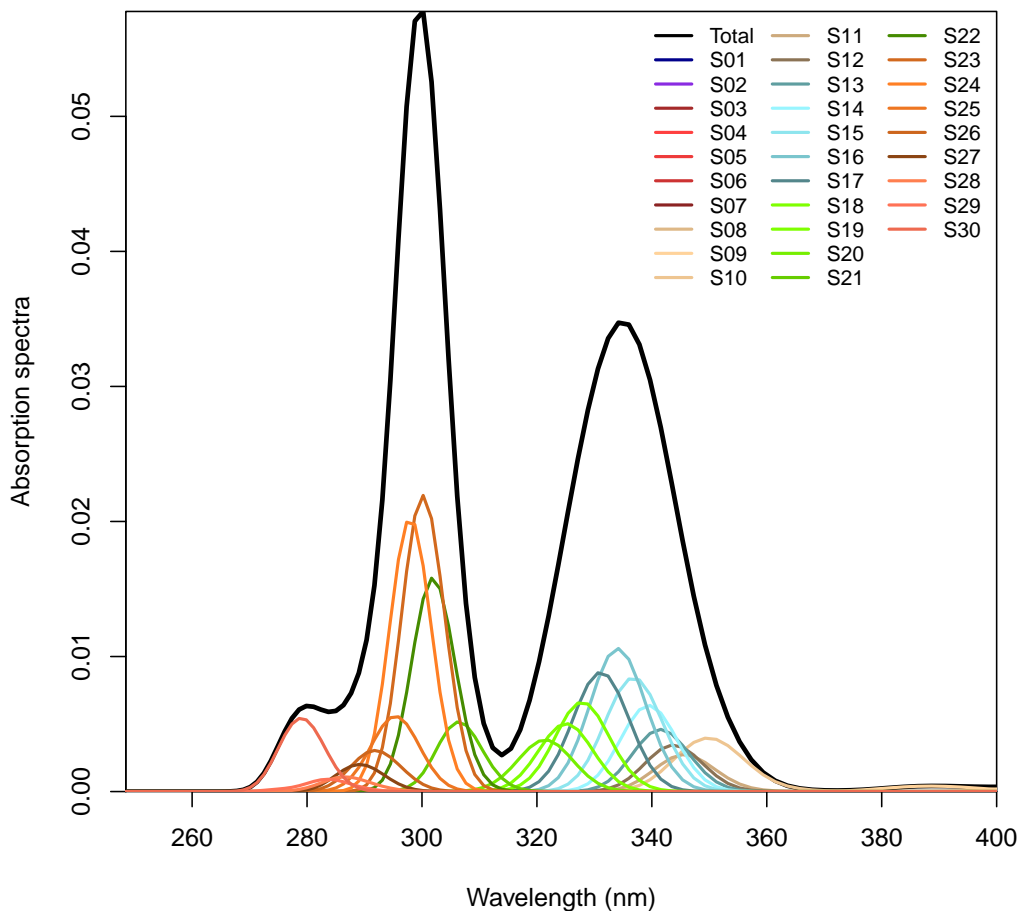

Figure S 1: Individual contributions from 30 electronic excited states to the calculated total equilibrated absorption spectrum for [4]CPY at 300 K. The absorption maximum at 300 nm contains contributions mainly from states  $S_{22}$  to  $S_{25}$ , while contributions to the lower energy peak at 340 nm are mainly from states  $S_5$  to  $S_9$ . Accordingly, our simulated laser pulse centered at 300 nm leads to a distribution of initial electronic populations relating to the relative oscillator strengths of contributing states within the specified full width at half maximum (FWHM) of 100 fs. We obtain 25% on  $S_{22}$ , 34% on  $S_{23}$ , 27% on  $S_{24}$ , 9% on  $S_{25}$ , and minor contributions from  $S_{21}$ ,  $S_{26}$  and  $S_{28}$ .
